# Supplementary material
Source: PubMed Central journal article supplement (PMC5470040)

Syntaxin1:SNAP25a:Munc18-1 complex without synaptobrevin-incubation.

(a) Western blotting for Munc18-1  
(lane 1, Figure 4B)

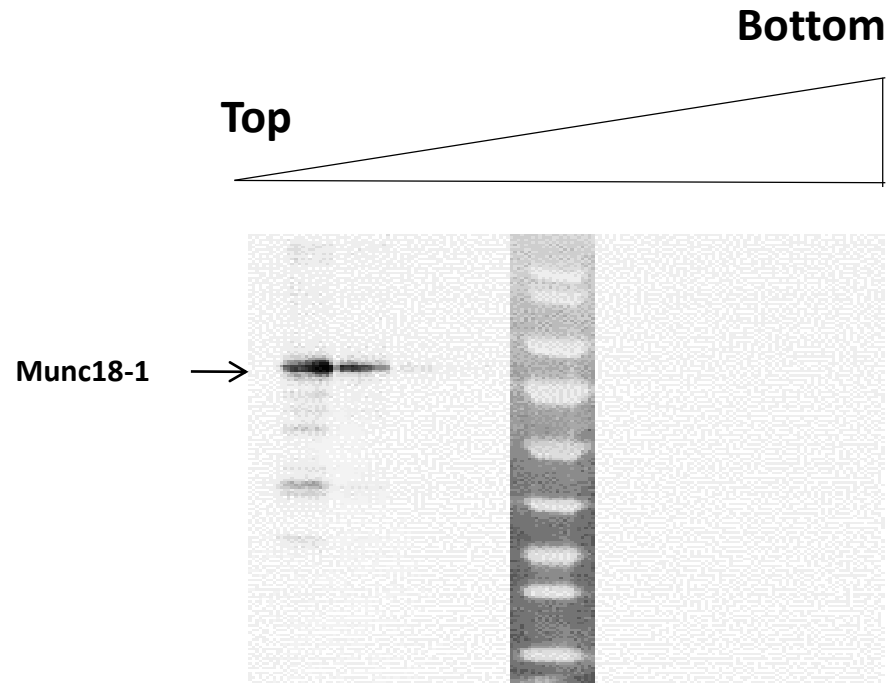

(b) Western blotting for Synaptobrevin  
(lane 3, Figure 4B)

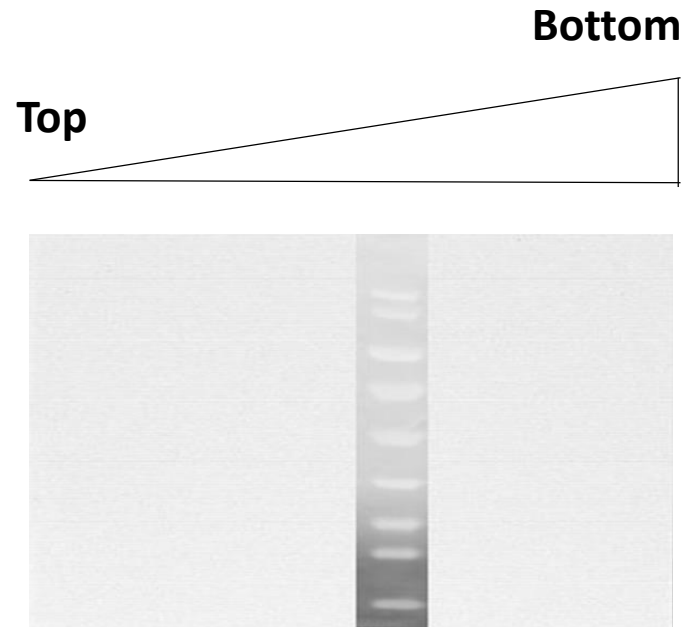

Syntaxin1:SNAP25a:Munc18-1 complex with synaptobrevin-incubation.

(a) Western blotting for Munc18-1  
(lane 2, Figure4B )

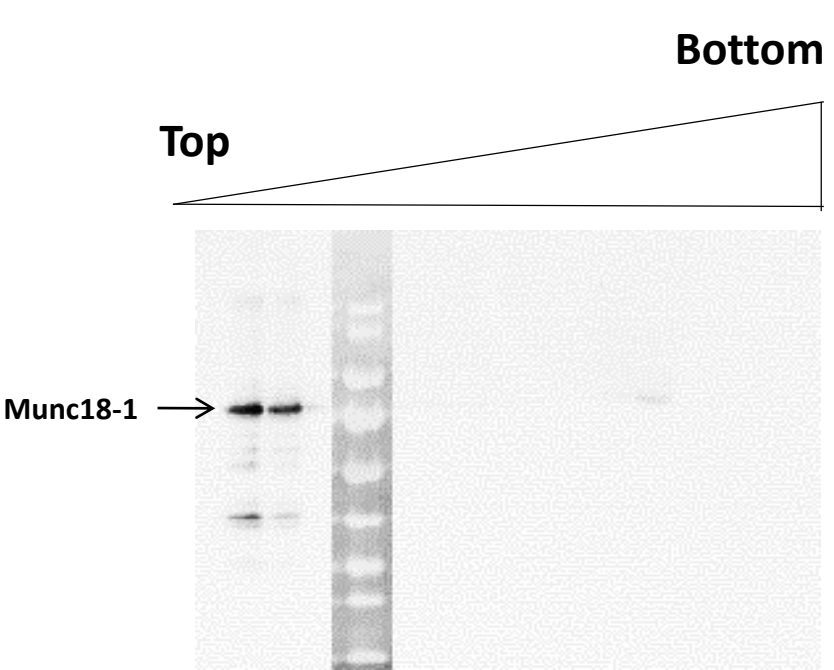

(b) Western blotting for Synaptobrevin  
(lane4, Figure4B)

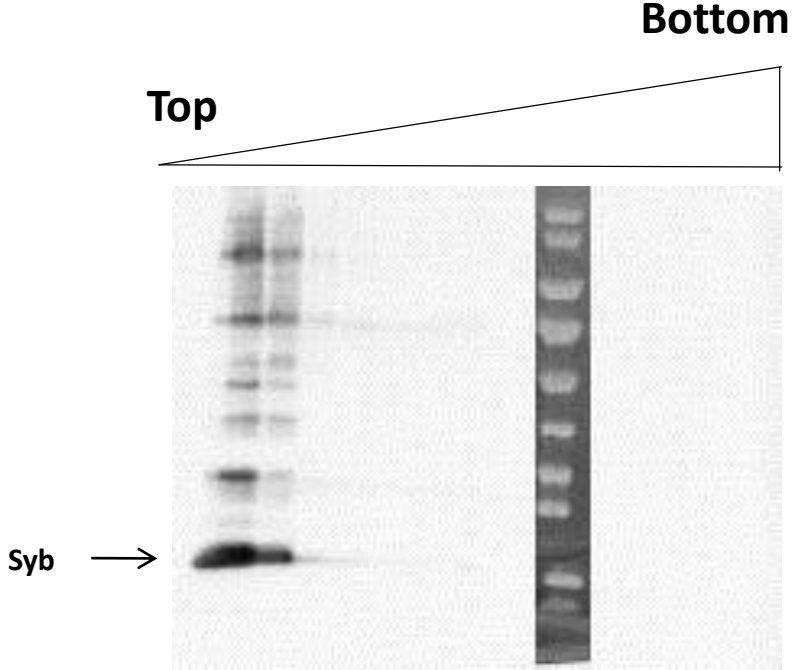

# Incubation of protein-free liposomes with Munc18-1

Western blotting for Munc18-1  
(lane 5, Figure 4B)

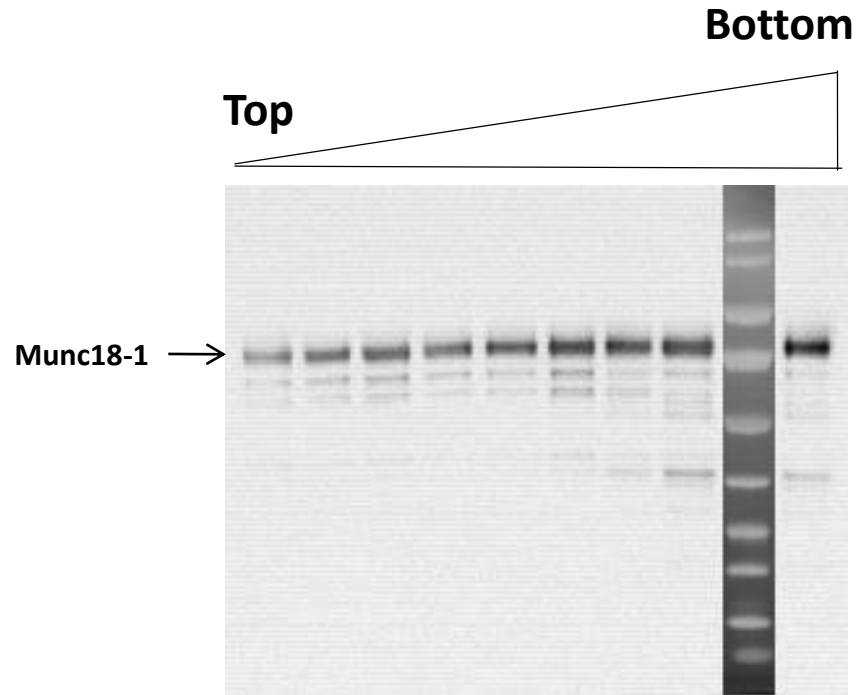

Molecular marker used:

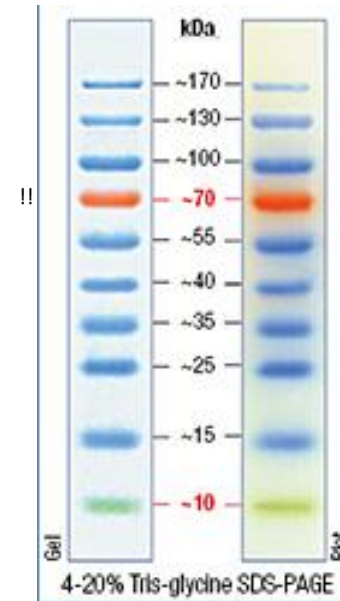

Supplement: EMBJ-36-1788-s004.pdf [file EMBJ-36-1788-s004.pdf]
